# Supplementary material
Source: PubMed Central journal article supplement (PMC6408894)
Supplement: rspb20181713supp1.pdf [file rspb20181713supp1.pdf]

1 **SUPPLEMENTAL MATERIAL**

2 **Appendix S1.** Location and climate details for sampled populations

3 **Appendix S2:** Locating the South African source population for east Australian *Arctotheca*  
4 *populifolia*.

5 **Appendix S3:** Additional experimental details

6 **Appendix S4:** Differences among introduced populations in Australia

7 **Appendix S5:** Multivariate analysis of source and introduced plants

8 **Appendix S6:** Raw data.

9 **Appendix S1: Location and climate details for sampled populations**

10

11 **Figure S1a.** Map showing location of source population (Arniston, South Africa) and the four  
12 populations in eastern Australia.

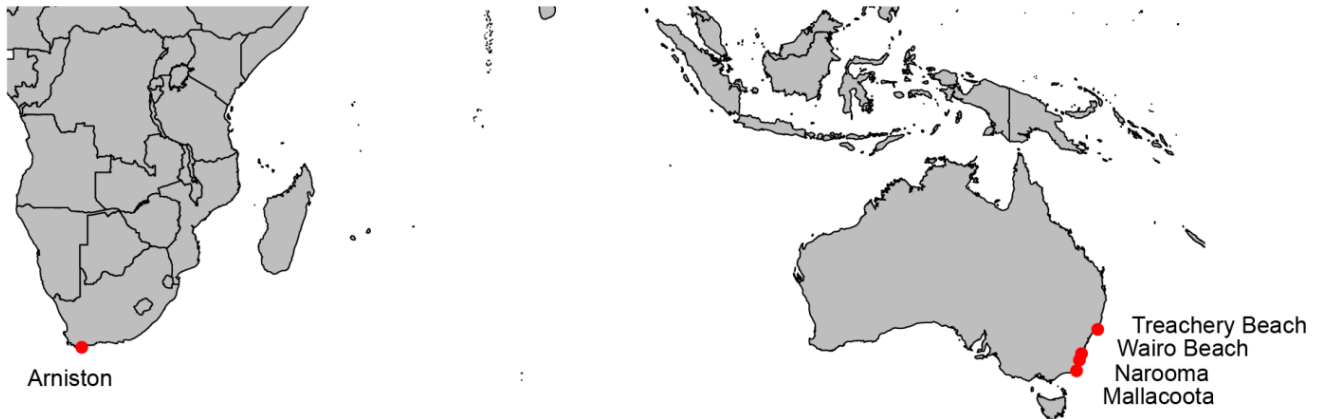

13

14 **Table S1. GPS co-ordinates of collection locations, and climate data.** Climate data obtained  
 15 with permission from the South African Weather Service and the Australian Government Bureau  
 16 of Meteorology.

|                                    | Latitude | Longitude | Mean minimum temperature (°C) | Mean maximum temperature (°C) | Mean annual rainfall (mm) |
|------------------------------------|----------|-----------|-------------------------------|-------------------------------|---------------------------|
| Source population (South Africa)   |          |           |                               |                               |                           |
| Arniston                           | -34.6579 | 20.2329   | 13.5                          | 20.4                          | 448                       |
| Introduced populations (Australia) |          |           |                               |                               |                           |
| Treachery beach                    | -32.4468 | 152.5202  | 14.3                          | 22.8                          | 1482                      |
| Wairo beach                        | -35.4423 | 150.4089  | 13.1                          | 20.6                          | 1078                      |
| Narooma                            | -36.2238 | 150.1401  | 12.0                          | 20.0                          | 912                       |
| Mallacoota                         | -37.5688 | 149.7621  | 10.8                          | 19.4                          | 939                       |

17

18 **Figure S1b. Mean monthly rainfall** (mm) experienced by the source population in Arniston,  
 19 South Africa, and the four introduced populations on the east coast of Australia (ordered from  
 20 left to right with increasing latitude). Data obtained with permission from the South African  
 21 Weather Service and the Australian Government Bureau of Meteorology.

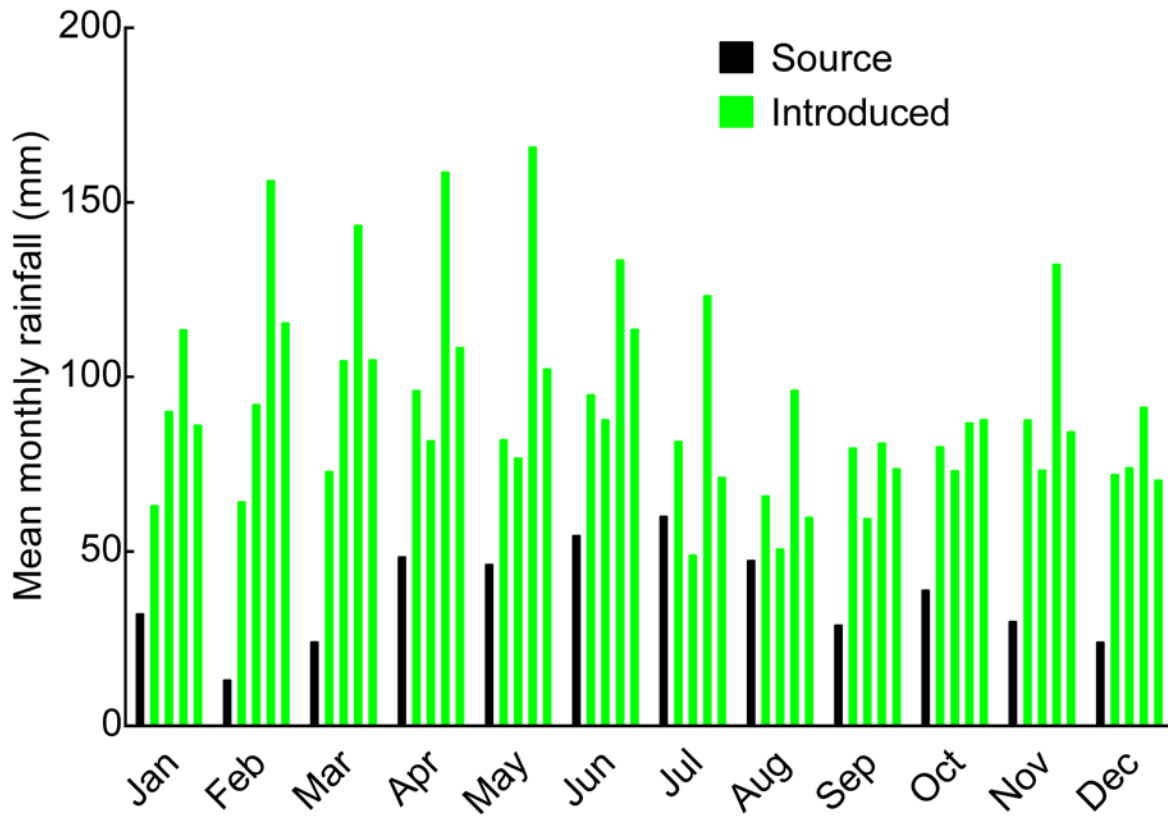

23 **Appendix S2. Locating the South African source population for east Australian *Arctotheca***  
24 ***populifolia*.**

25

26 Leaves were collected from 188 plants in ten populations spanning the entire native range of  
27 *Arctotheca populifolia*, and from 160 plants in seven populations across Australia [1]. Rollins et  
28 al. extracted DNA, and genotyped the plants using seven polymorphic microsatellite loci.  
29 Analysis of the microsatellite data showed that there had been two separate introductions of *A.*  
30 *populifolia* to Australia: one to the east coast and one to the west coast [1]. Our focus is on the  
31 eastern-Australian introduction.

32

33 ***STRUCTURE and PCA analyses***

34 Rollins et al.'s STRUCTURE [2, 3] analysis revealed that the four eastern-Australian  
35 populations of *Arctotheca populifolia* are very similar to one another, and came from western  
36 South Africa [1]. STRUCTURE plot membership values for the genetic group holding all eastern  
37 Australian plants were highest for plants from Arniston, South Africa (0.975), followed by plants  
38 from Muizenberg (0.930) and Cape St Francis (0.838; pers. comm. Rollins). Rollins et al. also  
39 presented a principal coordinate analysis (PCA) of the genetic distances between introduced and  
40 home range populations of *A. populifolia* [1]. The PCA showed that the Australian populations  
41 of *A. populifolia* were most similar to the population from Arniston, with populations from  
42 Muizenberg and Cape St Francis next closest. However, STRUCTURE does not provide  
43 statistical testing to determine the likely source population for the east-Australian introduction.

44 Indeed, STRUCTURE amalgamates individuals into groups that appear to be random mating,  
45 which is clearly not likely to be the case for populations separated by the Indian Ocean. Thus,  
46 although Rollins et al.'s work pointed toward Arniston as a likely source population, further  
47 analysis was required. We used two approaches:  $R_{ST}$  and  $LOD$ .

48

#### 49 **$R_{ST}$ analysis**

50  $R_{ST}$  is a population differentiation measure that uses information on not only the allele  
51 proportions in the population, but also the length of microsatellite repeat alleles at each locus.  $R_{ST}$   
52 is thought to give better analysis of relationship between groups than other differentiation  
53 methods that only use proportion data (eg  $G_{ST}$ ,  $F_{ST}$ ). However, this better performance occurs  
54 under quite restricted conditions, including complete separation of the groups and tens to  
55 hundreds of generations since separation of the groups [4]. Fortunately, our system satisfies these  
56 conditions: there is little likelihood of gene flow between African and Australian populations,  
57 and *A. populifolia* will have been through more than 80 generations since arriving in Australia  
58 because it produces seeds within a year of establishing (pers. obs. CRB) and was introduced to  
59 Australia in the 1930s [5].

60

61 The  $R_{ST}$  analysis considered ten locations that were sampled at approximately 200 km intervals  
62 along the species' entire range on the coast of Africa [Figure 2a in 1]. These were each compared  
63 with pooled data from the same eastern Australian locations shown in Appendix S1. Pooling was  
64 justified for two reasons: because of the high genetic similarity and low variability of the

65 Australian population [1]; and because we were searching for the common origin of all four  
 66 populations.  $R_{ST}$  values were calculated with RstCALC [calculated with RstCALC; 6].

67

68 The  $R_{ST}$  analysis showed that the east Australian populations were the most similar to the  
 69 Arniston population (table S2a). However, populations from Rocherpan, Muizenberg, Hartenbos,  
 70 Cape St Francis and Kenton-on-Sea had  $R_{ST}$  values whose standard errors overlapped with  
 71 Arniston's, so cannot be ruled out as potential source populations based on the  $R_{ST}$  analysis. A  
 72 related differentiation measure,  $\Delta\mu^2$  yielded similar results, including placing Arniston as  
 73 the most similar to the east Australian populations (table S2a).

74

75 **Table S2a Estimates of RHO and  $\Delta\mu^2$ .** RHO is the mean estimate of  $R_{ST}$  across loci in  
 76 comparisons between the pooled east Australian *Arctotheca populifolia* populations versus each  
 77 South African population.  $\Delta\mu^2$  is a measure of the differentiation of repeat length between  
 78 the pooled east Australian *Arctotheca populifolia* populations and each South African  
 79 population.  $\Delta\mu^2$  was calculated using *RSTOUT2a.out*. Standard errors cannot be calculated  
 80 for this metric. Bold font indicates the South African population most similar to the east  
 81 Australian population (Arniston, for both metrics).

| Population    | RHO (standard error) | $\Delta\mu^2$ |
|---------------|----------------------|---------------|
| Strandfontein | 0.648 (0.148)        | 25.1853       |
| Rocherpan     | 0.499 (0.130)        | 10.3839       |
| Muizenberg    | 0.473 (0.170)        | 6.1437        |

|                 |                      |               |
|-----------------|----------------------|---------------|
| <b>Arniston</b> | <b>0.355 (0.135)</b> | <b>3.8767</b> |
| Hartenbos       | 0.531 (0.133)        | 7.836         |
| Cape St Francis | 0.399 (0.109)        | 6.6081        |
| Kenton-on-Sea   | 0.499 (0.117)        | 11.5079       |
| Kei Mouth       | 0.714 (0.141)        | 53.4352       |
| Trafalgar       | 0.980 (0.016)        | 66.9422       |
| Umlalazi        | 0.997 (0.002)        | 67.0621       |

82

83 *LOD Analysis*

84 On the basis of the results from  $R_{ST}$ , STRUCTURE and PCA analyses, Arniston seemed the most  
85 likely source population. However, five populations from Rocherpan, Muizenberg, Hartenbos,  
86 Cape St Francis and Kenton-on-Sea are also possible sources, because of the overlap of standard  
87 errors in the  $R_{ST}$  analysis. Therefore, we compared the probability of Arniston (AR) being the  
88 source of the east Australian population with the probability of each of the other five candidate  
89 South African populations 'x' being the source population. In other words, we evaluate two  
90 hypotheses: AR as source vs 'x' as source. Evaluation was performed using a log odds (LOD)  
91 ratio:

92 *Equation 1:*  $LOD (AR \text{ vs } x) = \log (P_{AR} / P_x)$

93 where  $P_{AR}$  and  $P_x$  are the probabilities of seeing the Australian data if it is a sample from the  
94 relevant South African population, either AR, or one of the five competing hypothetical  
95 ancestors 'x'. These probabilities were calculated using the multinomial:



96 
$$\text{Equation 2: } P_{(\text{locus } A)} = \frac{N!}{Np_{1 \text{ in } EA}! * Np_{2 \text{ in } EA}! * \dots} * p_1^{Np_{1 \text{ in } EA}} * p_2^{Np_{2 \text{ in } EA}} * \dots$$

97 Where  $N$  is the total number of alleles sampled from Eastern Australia ;  $p_1 p_2 \dots$  represent each  
 98 allele found in the east Australian population, with  $p_1$  etc being the allele proportions in the  
 99 relevant South African population (i.e, AR or its competitor  $x$ ); and  $p_{1 \text{ in } EA}$  etc being the  
 100 proportions in east Australia. For each South African population, his multinomial is calculated  
 101 for each locus, then values for each of the seven loci are multiplied together to give  $P_{AR}$  or  $P_x$ .

102

103 One complication is that all candidate source populations except Arniston were missing at least  
 104 one of the alleles present in east Australia. This could indicate that a) these populations are not  
 105 the source, or b) that the alleles were present in the population but were not sampled. We cannot  
 106 rule the second possibility out, so we included all these populations in the analyses. However, the  
 107 probabilities (from equation 2) that are used in the LOD are based on allele proportions  
 108 multiplied across all the alleles present in east Australia. If one of these alleles is zero in the  
 109 target population, then  $P_x = 0$ , which makes  $\log(P_{AR}/P_x)$  undefined. Note that it is allowable  
 110 to reverse the comparison and calculate  $\log(P_x/P_{AR})$ , but in our case this term will still be  
 111 undefined when  $P_x = 0$ . Thus, where an east Australian allele is missing in population 'x', we  
 112 must make some alteration. To minimise false discovery of Arniston as the source, we designed  
 113 the missing allele correction to be conservative (ie. it is biased against showing that Arniston is  
 114 more likely to be the source). Thus, we applied a correction that makes the allele proportion in  
 115 population 'x' more similar to the proportion in east Australia. This was done by adjusting the

116 missing allele in  $x$  to the highest proportion that could have a 95% chance of not being sampled  
117 in a sample of that size:

118 *Equation 3: missing allele proportion =  $1 - 10^{[(\log 0.95)/n]}$*

119 where  $n$  is the total number of alleles sampled from  $x$ . We must then of course reduce all other  
120 allele proportions so that allele proportions still sum to unity in population  $x$ , ie each other allele  
121 proportion is multiplied by (1-new 'missing' allele proportion).

122

123 All five of our calculated LOD scores were highly positive (table S1). A positive LOD suggests  
124 that Arniston is the likely source, while a negative LOD suggests that the other South African  
125 population is the likely source. A LOD score of 2 would indicate that Arniston was 100 times  
126 more likely to be the source than the competing ( $x$ ) population, while a LOD score of 3 would  
127 indicate that Arniston was 1000 times more likely to be the source than the competing  
128 population. It is common for researchers to use thresholds of two or three as cut-offs for  
129 assigning source populations [7]. Here, the lowest LOD score was 99.9 (for Cape St Francis;  
130 table S1). Another way of assigning statistical significance to LOD scores is to convert the LOD  
131 to a chi square value (as recommended by Lander and Krugylak [7]). In this case, all five  
132 analyses suggest that Arniston is significantly ( $p < 0.0001$ , with Bonferroni correction) more  
133 likely to be the source population than is any other South African population.

134 **Table S2b.** LOD and Chi square estimates for likelihood of Arniston being source of east  
135 Australia versus other potential source populations. After Bonferroni correction, all chi square  
136 values yield  $p < 0.0001$ .

| <b>Comparison</b>          | <b>LOD</b> | <b>Chi square (1df)</b> |
|----------------------------|------------|-------------------------|
| Arniston - Rocherpan       | 513.0      | 2362.5                  |
| Arniston - Muizenberg      | 265.6      | 1223.2                  |
| Arniston - Hartenbos       | 777.2      | 3579.4                  |
| Arniston - Cape St Francis | 99.9       | 459.9                   |
| Arniston - Kenton-on-Sea   | 157.1      | 723.5                   |

137

138 **Appendix S3: Additional experimental details**

139 **Table S3a.** Number of plants from which seeds were collected at each location; number of  
 140 parent plants planted and number of plants producing seeds in the first year of the experiment  
 141 (these seeds were then used in the main experiment – in order to minimize any maternal effects).

|                                            | Original number of plants collected at each location | Number of parent plants planted in the glasshouse | Number of plants producing seeds |
|--------------------------------------------|------------------------------------------------------|---------------------------------------------------|----------------------------------|
| <b>Source population in South Africa</b>   |                                                      |                                                   |                                  |
| Arniston                                   | 46                                                   | 143                                               | 36                               |
| <b>Introduced populations in Australia</b> |                                                      |                                                   |                                  |
| Treachery beach                            | 17                                                   | 41                                                | 20                               |
| Wairo beach                                | 38                                                   | 68                                                | 53                               |
| Narooma                                    | 24                                                   | 39                                                | 26                               |
| Mallacoota                                 | 45                                                   | 70                                                | 51                               |
| <b>Total</b>                               | <b>170</b>                                           | <b>356</b>                                        | <b>186</b>                       |

142

143 **Table S3b.** Soil composition for the glasshouse experiment.

| <b>Soil component</b>                                                                                                                                                                                                                               | <b>Amount used</b> |
|-----------------------------------------------------------------------------------------------------------------------------------------------------------------------------------------------------------------------------------------------------|--------------------|
| River sand                                                                                                                                                                                                                                          | 20 kg              |
| Cocopeat                                                                                                                                                                                                                                            | 25 kg              |
| Osmocote© Exact Standard 5-6 Month fertilizer                                                                                                                                                                                                       | 65 g               |
| General fertilizer: 26% dolomite; 13% of each of the following: superphosphate, blood and bone, lime, gypsum, potassium nitrate; 9% trace elements (S: 6.29%, Ca: 10%, Mg: 3.6%, Mn: 2.88%, Fe: 2.73%, Cu: 1.25%, Zn: 1%, B: 0.09% and Mo: 0.0038%) | 65 g               |

144

145 **Table S3c.** Number of plants planted for each population in the main experiment.

|                        | <b>Number of plants for year-long experiment (pot size: 15 cm × 15 cm)</b> | <b>Number of plants for harvesting at 12 weeks (pot size: diameter 10 cm × height 7 cm)</b> |
|------------------------|----------------------------------------------------------------------------|---------------------------------------------------------------------------------------------|
| Source population      |                                                                            |                                                                                             |
| Arniston, South Africa | 123                                                                        | 21                                                                                          |
| Introduced populations |                                                                            |                                                                                             |
| Treachery beach        | 40                                                                         | 13                                                                                          |
| Wairo beach            | 68                                                                         | 23                                                                                          |
| Narooma                | 39                                                                         | 12                                                                                          |
| Mallacoota             | 70                                                                         | 22                                                                                          |
| <b>Total</b>           | <b>340</b>                                                                 | <b>91</b>                                                                                   |

147 **Table S3d.** A test for the effect of maternal line on experimental traits. Results are from a univariate  
 148 general linear model (GLM) with the trait of interest as a dependent variable and maternal group as a  
 149 random factor, followed by a Holm-Bonferroni sequential correction. An asterisk denotes a significant  
 150 effect of maternal line.

|                        | <b>Population</b> |                     |                  |                      |                          |
|------------------------|-------------------|---------------------|------------------|----------------------|--------------------------|
|                        | Arniston<br>(SA)  | Mallacoota<br>(AUS) | Narooma<br>(AUS) | Wairo Beach<br>(AUS) | Treachery<br>Beach (AUS) |
| <b>Trait</b>           | <b>p-values</b>   |                     |                  |                      |                          |
| Plant length           | 0.088             | 0.206               | 0.624            | 0.281                | 0.387                    |
| Plant height           | 0.305             | 0.497               | 0.464            | 0.226                | 0.987                    |
| Plant growth form      | 0.360             | 0.305               | 0.639            | 0.014                | <0.001*                  |
| Leaf area              | 0.324             | 0.060               | 0.524            | 0.490                | 0.200                    |
| Leaf shape             | 0.202             | 0.188               | 0.526            | 0.117                | 0.229                    |
| SLA                    | <0.001*           | 0.387               | 0.412            | 0.612                | 0.754                    |
| Average leaf thickness | 0.001*            | 0.477               | 0.227            | 0.201                | 0.544                    |
| Leaf density           | 0.257             | 0.585               | 0.377            | 0.885                | 0.804                    |
| LDMC                   | <0.001*           | 0.217               | 0.870            | 0.430                | 0.715                    |

**152 Appendix S4: Differences among introduced populations in Australia**

153 Our main hypothesis concerned the differences between source plants in South Africa and  
154 introduced plants in Australia. Nevertheless, we still wanted to test if there were any differences  
155 in traits among the four introduced populations in Australia, as it has been shown that introduced  
156 plants can evolve clinal differences across the range of their new environment [8]. Leaf dry  
157 matter content (LDMC) decreased with increasing latitude ( $p < 0.03$ , figure S4). Leaf density also  
158 showed significant differences among Australian populations ( $p < 0.022$ ) but since leaf density  $\approx$   
159 leaf dry matter content [9] this correlation is expected. Three other traits (leaf thickness, plant  
160 growth form, leaf shape) showed only marginally significant differences ( $0.04 < p < 0.05$ ) among  
161 Australian populations (table S4). When we applied a Holm-Bonferroni sequential correction to  
162 counteract the problem of multiple comparisons [10], only LDMC remained significantly  
163 different among Australian populations (table S4).

164 **Table S4.** Results of one-way analyses of variance (ANOVAs) contrasting each trait among the  
 165 four introduced populations in Australia. The adjusted p-values are those after a Holm-  
 166 Bonferroni sequential correction to account for multiple tests [10].

| <b>Trait</b>                           | <b>MS</b> | <b>F</b> | <b>p-value</b>     | <b>Adjusted p-values</b> |
|----------------------------------------|-----------|----------|--------------------|--------------------------|
| Leaf dry matter content                | 497.0     | 7.247    | 0.001              | 0.013                    |
| Leaf density                           | 515.7     | 3.265    | 0.022 <sup>^</sup> | 0.264                    |
| Leaf thickness                         | 0.028     | 2.825    | 0.040              | 0.440                    |
| Plant growth form                      | 0.051     | 2.714    | 0.046              | 0.460                    |
| Leaf shape                             | 0.094     | 2.680    | 0.048              | 0.460                    |
| Plant length                           | 13651     | 2.526    | 0.059              | 0.472                    |
| log <sub>10</sub> (Specific leaf area) | 0.015     | 2.410    | 0.068              | 0.476                    |
| Leaf area                              | 105.5     | 2.087    | 0.103              | 0.618                    |
| Plant height                           | 3231      | 1.329    | 0.266              | 1.000                    |
| Above-ground biomass at 11 months      | 49.99     | 0.641    | 0.593              | 1.000                    |
| Below-ground biomass at 12 weeks       | 0.019     | 0.568    | 0.638              | 1.000                    |
| Total biomass at 12 weeks              | 0.114     | 0.480    | 0.697              | 1.000                    |
| Above-ground biomass at 12 weeks       | 0.044     | 0.362    | 0.780              | 1.000                    |

167 <sup>^</sup>Leaf density  $\approx$  Leaf dry matter content [9]



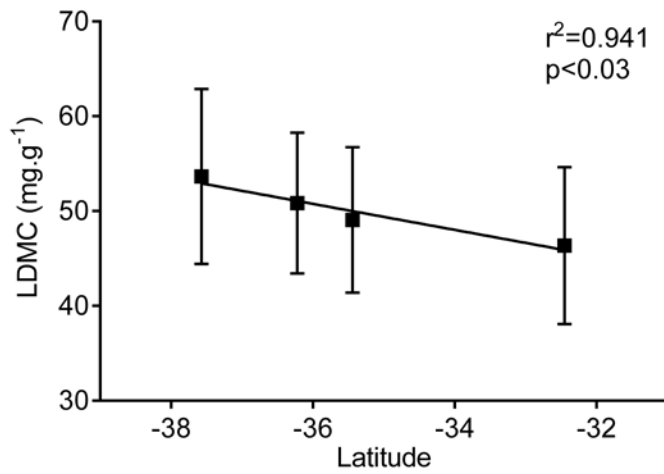

168

169 **Figure S4.** The correlation between leaf dry matter content (LDMC) and latitude for the four  
170 introduced populations in Australia. Points on the graph represent population means (+/- one  
171 standard deviation).

172 **Appendix S5: Multivariate analysis of source and introduced plants**

173 Source and introduced plants were found to be significantly different from each other when we  
174 tested individuals for differences using a multivariate analysis of variance (MANOVA,  $p < 0.001$ ).  
175 This kind of analysis uses multiple trait measurements which have been taken on the same  
176 individual plant, and so we based our analysis on nine of the twelve traits (biomass  
177 measurements at 12 weeks were measured on a separate set of young plants which were  
178 harvested; above-ground biomass at senescence was only measured on a subset of plants and  
179 therefore did not have a large enough sample size to be included). We created ordination plots  
180 using factor analysis [11] which showed that Factors 3 and 4 were more effective at separating  
181 out source and introduced plants than Factors 1 and 2 (figure S5). The proportion of variation  
182 explained by each trait in the multivariate analysis is given in Table S5.

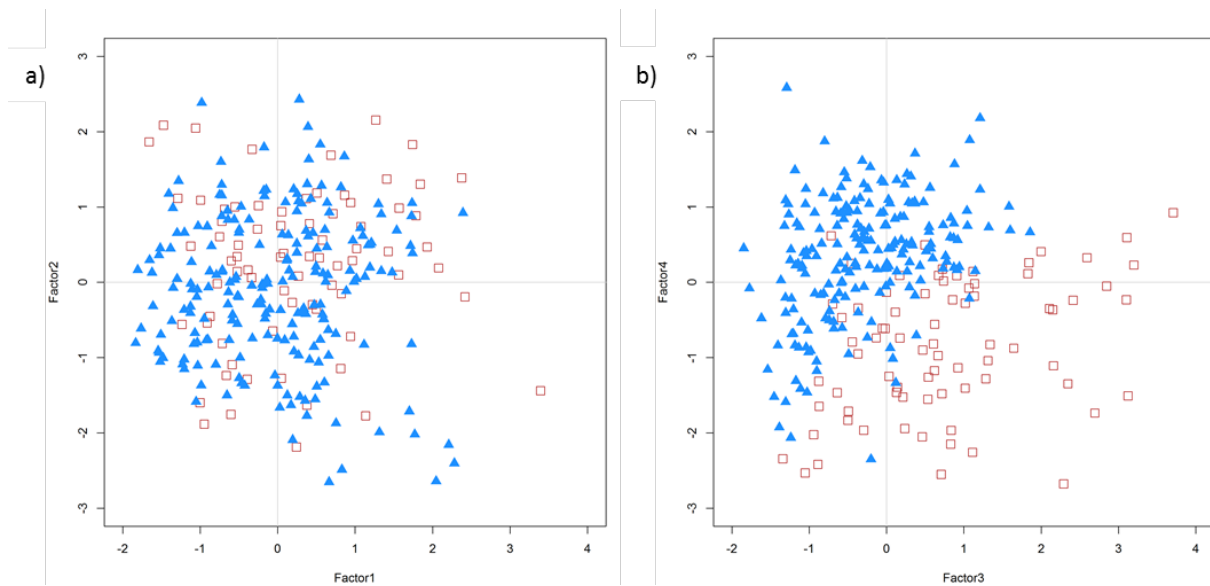

183

184 **Figure S5. Ordination plots using factor analysis.** Source plants are shown as squares and  
185 introduced plants are shown as triangles. Panel a) displays the data arrayed on axes of factors 1  
186 and 2, while panel b) displays the data arrayed on axes for factors 3 and 4.

187 **Table S5.** The proportion of variation explained by each trait in the multivariate analysis.

| <b>Trait</b>                           | <b>R<sup>2</sup></b> |
|----------------------------------------|----------------------|
| Plant growth form                      | 0.253                |
| Leaf shape                             | 0.230                |
| Plant length                           | 0.226                |
| Leaf area                              | 0.147                |
| Average leaf thickness                 | 0.111                |
| Leaf density                           | 0.073                |
| Plant height                           | 0.041                |
| Leaf dry matter content                | 0.008                |
| log <sub>10</sub> (Specific leaf area) | 0.007                |

189 **References**

- 190 1. Rollins LA, Moles AT, Lam S, Buitenwerf R, Buswell JM, Brandenburger CR, Flores-  
191 Moreno H, Nielsen KB, Couchman E, Brown GS, et al. 2013 High genetic diversity is not  
192 essential for successful introduction. *Ecol Evol* **3**, 4501-4517. (doi:10.1002/ece3.824/pdf).
- 193 2. Pritchard JK, Stephens M, Donnelly P. 2000 Inference of population structure using  
194 multilocus genotype data. *Genetics* **155**, 945-959.
- 195 3. Falush D, Stephens M, Pritchard JK. 2003 Inference of population structure using multilocus  
196 genotype data: linked loci and correlated allele frequencies. *Genetics* **164**, 1567-1587.
- 197 4. Balloux F, Lugon-Moulin N. 2002 The estimation of population differentiation with  
198 microsatellite markers. *Molecular ecology* **11**, 155-165. (doi:10.1046/j.0962-  
199 1083.2001.01436.x).
- 200 5. AVH Database. 2016 Australia's Virtual Herbarium, Council of Heads of Australasian  
201 Herbaria. <http://avh.ala.org.au>. Accessed on 10 August 2016.
- 202 6. Goodman SJ. 1997 RST Calc: a collection of computer programs for calculating estimates of  
203 genetic differentiation from microsatellite data and determining their significance. *Molecular*  
204 *Ecology* **6**, 881-885. (doi:10.1046/j.1365-294X.1997.00260.x).
- 205 7. Lander E, Kruglyak L. 1995 Genetic dissection of complex traits: guidelines for interpreting  
206 and reporting linkage results. *Nat Genet* **11**, 241. (doi:10.1038/ng1195-241).
- 207 8. Maron JL, Vilà M, Bommarco R, Elmendorf S, Beardsley P. 2004 Rapid evolution of an  
208 invasive plant. *Ecol Monogr* **74**, 261-280. (doi:10.1890/03-4027).

- 209 9. Pérez-Harguindeguy N, Díaz S, Garnier E, Lavorel S, Poorter H, Jaureguiberry P, Bret-Harte  
210 M, Cornwell W, Craine J, Gurvich D. 2013 New handbook for standardised measurement of  
211 plant functional traits worldwide. *Aust J Bot* **61**, 167-234. (doi:10.1071/BT12225).
- 212 10. Holm S. 1979 A simple sequentially rejective multiple test procedure. *Scand J Stat*, 65-70.
- 213 11. Everett B. 2013 *An introduction to latent variable models*, Springer Science & Business  
214 Media.
- 215
